# Supplementary material for: Artificial Intelligence and OCT Angiography in Full Thickness Macular Hole. New Developments for Personalized Medicine
Source: MDPI journal article supplement (doi:10.3390/diagnostics11122319), 2021-12-09
Supplement: s1 [file s1]

**Table S1.** Best corrected visual acuity data at baseline and 1-year after surgery of all enrolled eyes.

| Patient | BCVA (ETDRS letters) |                      |
|---------|----------------------|----------------------|
|         | Baseline             | 1-year after surgery |
| 1       | 14                   | 76                   |
| 2       | 8                    | 42                   |
| 3       | 21                   | 53                   |
| 4       | 21                   | 27                   |
| 5       | 17                   | 42                   |
| 6       | 17                   | 40                   |
| 7       | 27                   | 76                   |
| 8       | 17                   | 51                   |
| 9       | 8                    | 8                    |
| 10      | 17                   | 68                   |
| 11      | 27                   | 68                   |
| 12      | 34                   | 42                   |
| 13      | 17                   | 34                   |
| 14      | 42                   | 85                   |
| 15      | 27                   | 34                   |
| 16      | 34                   | 85                   |
| 17      | 51                   | 85                   |
| 18      | 34                   | 76                   |
| 19      | 27                   | 42                   |
| 20      | 27                   | 34                   |
| 21      | 34                   | 76                   |
| 22      | 34                   | 68                   |
| 23      | 8                    | 42                   |
| 24      | 51                   | 42                   |
| 25      | 27                   | 76                   |
| 26      | 68                   | 68                   |
| 27      | 34                   | 42                   |
| 28      | 21                   | 76                   |
| 29      | 42                   | 51                   |
| 30      | 42                   | 76                   |
| 31      | 27                   | 68                   |
| 32      | 42                   | 42                   |
| 33      | 42                   | 85                   |
| 34      | 27                   | 51                   |
| 35      | 34                   | 51                   |

**BCVA** = Best corrected visual acuity; **ETDRS**: Early treatment diabetic retinopathy study.
